# Supplementary material for: A Self-Healing Thermoset Epoxy Modulated by Dynamic Boronic Ester for Powder Coating
Source: MDPI journal article supplement (doi:10.3390/polym15193894), 2023-09-26
Supplement: s1 [file s1]

# A self-healing thermoset epoxy modulated by dynamic boronic ester for powder coating

Yongqi Liu<sup>1,2</sup>, Ziyuan Li<sup>3</sup>, Caifu Zhang<sup>4</sup>, Biru Yang<sup>1,2</sup>, Hua Ren<sup>1,2\*</sup>

1 Ningbo Research Institute, Zhejiang University, Ningbo 315807, China

2 State Key Laboratory of Chemical Engineering, College of Chemical and Biological Engineering, Zhejiang University, Hangzhou 310027, China

3 School of Biological and Chemical Engineering, Ningbo Tech University, Ningbo, 315100, China

4 Tongling Shanwei New Material Technology Inc. Co., Ltd. Tongling, 244000, China

\*Correspondence: renh@zju.edu.cn

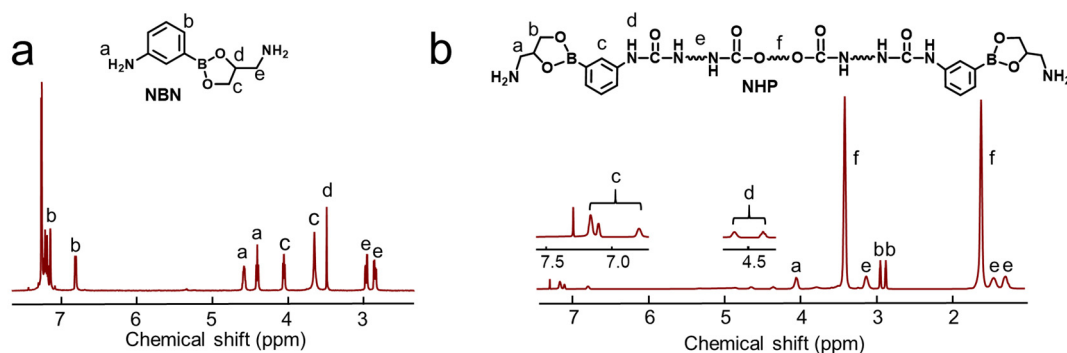

Figure S1. Chemical structure and the <sup>1</sup>H NMR spectra of (a) NBN and (b) NHP.

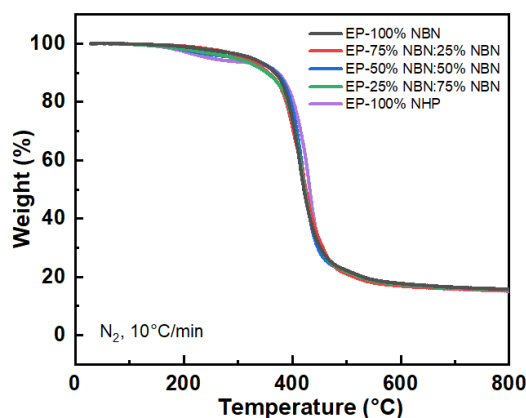

Figure S2. The thermogravimetric analysis (TGA) curves for all resins under nitrogen atmosphere, the heating rate=10 °C/min.

Table S1. Thermal stability factors of five samples obtained from TGA and DTG curves.

| Sample             | T <sub>g</sub> (°C) | T <sub>5 wt% loss</sub> (°C) |
|--------------------|---------------------|------------------------------|
| EP-100% NBN        | 35.52               | 326.03                       |
| EP-75% NBN:25% NHP | 41.70               | 314.23                       |
| EP-50% NBN:50% NHP | 51.39               | 311.84                       |
| EP-25% NBN:75% NHP | 56.56               | 295.36                       |
| EP-100% NHP        | 63.71               | 250.43                       |

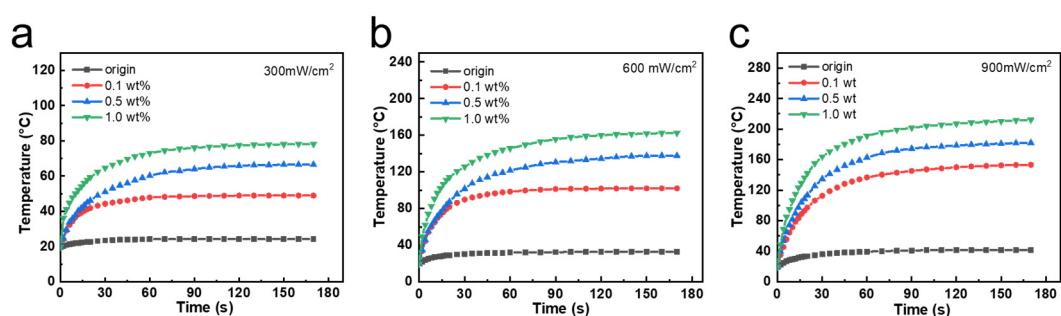

Figure S3. Time-temperature curve of different samples under different power of infrared laser. (a) 300 mW/cm<sup>2</sup>, (b) 600 mW/cm<sup>2</sup>, (c) 900 mW/cm<sup>2</sup>.

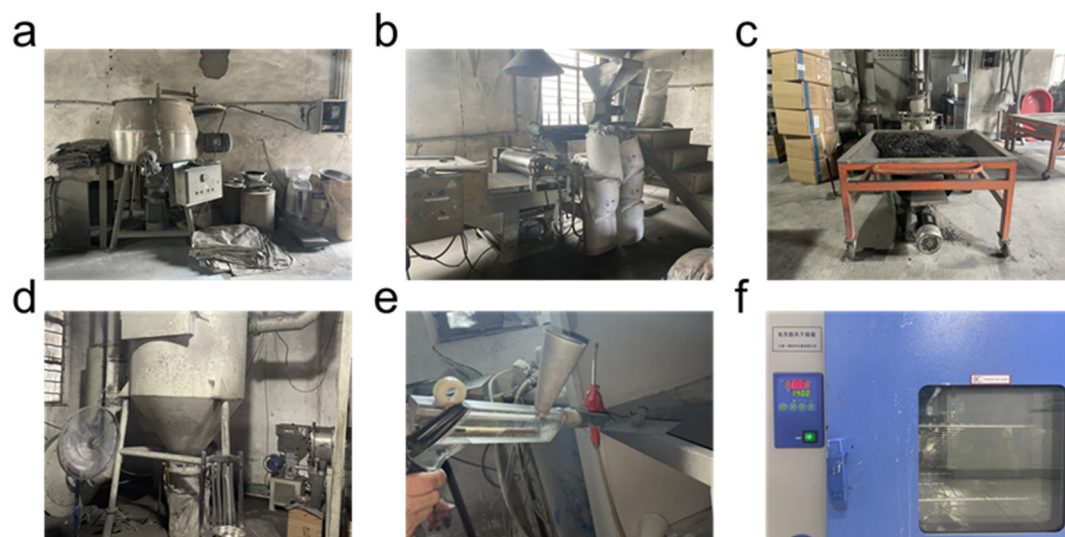

Figure S4. The images of powder coating process, (a) premixing and grinding, (b) melt extrusion, (c) cooling fracturing, (d) screening and grading, (e) electrostatic spraying, (f) curing and film forming.
